# Supplementary material for: Identification of Pro-Fibrotic Macrophage Populations by Single-Cell Transcriptomic Analysis in West Highland White Terriers Affected With Canine Idiopathic Pulmonary Fibrosis
Source: Front Immunol. 2020 Dec 15;11:611749. doi: 10.3389/fimmu.2020.611749 (PMC7770158; doi:10.3389/fimmu.2020.611749)
Supplement: Supplementary file 5 [file Table_5.xlsx]

## Sheet: Feuil1
Supplementary Table 5: Gene set enrichment analyses (GSEAs) between Hallmark Gene Sets or Gene Ontology Biological Process Gene sets and differentially expressed genes in each macrophages/monocytes subsets compared to others.
	NAME	SIZE	ES	NES	NOM p-val	FDR q-val	RANK AT MAX
Hallmark Gene Sets
M0	HALLMARK_REACTIVE_OXYGEN_SPECIES_PATHWAY	6	0.604743	1.80239	0.0167598	0.133389	12
M1	HALLMARK_INFLAMMATORY_RESPONSE	16	0.461776	1.66125	0.0344371	0.222184	21
	HALLMARK_REACTIVE_OXYGEN_SPECIES_PATHWAY	6	-0.62827	-1.85517	0.0084507	0.110499	68
M2	HALLMARK_REACTIVE_OXYGEN_SPECIES_PATHWAY	4	-0.75622	-1.63505	0.0276243	0.124863	21
	HALLMARK_FATTY_ACID_METABOLISM	5	-0.73966	-1.75196	0.00915751	0.0736592	10
	HALLMARK_ADIPOGENESIS	12	-0.536045	-1.76414	0.0190311	0.129624	47
M3	HALLMARK_REACTIVE_OXYGEN_SPECIES_PATHWAY	6	-0.552761	-1.63984	0.0438871	0.0800531	13
	HALLMARK_EPITHELIAL_MESENCHYMAL_TRANSITION	15	-0.377451	-1.72233	0.0212766	0.0743615	143
	HALLMARK_TNFA_SIGNALING_VIA_NFKB	8	-0.609676	-2.07331	0	0.0171391	61
M4	HALLMARK_ALLOGRAFT_REJECTION	10	0.869764	1.88841	0	0	10
	HALLMARK_INFLAMMATORY_RESPONSE	4	0.785822	1.41364	0.0585886	0.195984	1
	HALLMARK_INTERFERON_GAMMA_RESPONSE	3	0.783145	1.35315	0.10271	0.201899	0
Gene Ontology Biological Process Gene sets
M0	/
M1	GO_INTERFERON_GAMMA_PRODUCTION	6	0.850993	2.18604	0	0.152411	50
	GO_LEUKOCYTE_CELL_CELL_ADHESION	18	0.554316	2.09109	0.0026178	0.24516	93
M2	GO_EXTRACELLULAR_STRUCTURE_ORGANIZATION	10	0.728976	2.32788	0	0.0236671	36
	GO_REGULATION_OF_CELL_MORPHOGENESIS	5	0.917293	2.30363	0	0.0155243	15
	GO_NEURON_DEVELOPMENT	11	0.614173	2.06297	0.00212314	0.145726	59
	GO_INTERSPECIES_INTERACTION_BETWEEN_ORGANISMS	14	0.55854	2.008	0.00454545	0.189032	30
	GO_LEUKOCYTE_MIGRATION	18	0.498231	1.98258	0.00457666	0.186418	36
	GO_CELL_MORPHOGENESIS_INVOLVED_IN_NEURON_DIFFERENTIATION	8	0.653846	1.97091	0.00729927	0.173683	52
	GO_CELL_MORPHOGENESIS_INVOLVED_IN_DIFFERENTIATION	8	0.653846	1.95011	0.00938967	0.182548	52
	GO_NEGATIVE_REGULATION_OF_CELLULAR_COMPONENT_ORGANIZATION	9	0.627618	1.91439	0.00854701	0.221719	19
	GO_REGULATION_OF_HYDROLASE_ACTIVITY	18	0.484865	1.91086	0.00691244	0.203329	21
	GO_GRANULOCYTE_MIGRATION	8	0.64659	1.89675	0.00659341	0.207306	31
	GO_REGULATION_OF_CELL_SHAPE	3	0.948148	1.88733	0.00208768	0.204462	9
	GO_VIRAL_LIFE_CYCLE	6	0.720137	1.87955	0.00447427	0.20093	30
	GO_NEUTROPHIL_MIGRATION	8	0.64659	1.87637	0.00869565	0.190167	31
	GO_LYMPHOCYTE_MIGRATION	10	0.581422	1.87563	0.013544	0.178548	43
	GO_GLIAL_CELL_MIGRATION	5	0.781955	1.85979	0	0.190694	33
	GO_DEVELOPMENTAL_CELL_GROWTH	5	0.759399	1.85653	0.00226757	0.183764	36
	GO_REGULATION_OF_DEVELOPMENTAL_GROWTH	7	0.664122	1.84511	0.00441501	0.189873	50
	GO_RESPONSE_TO_INTERLEUKIN_1	10	0.57297	1.80998	0.020362	0.238746	43
	GO_NEGATIVE_REGULATION_OF_DEVELOPMENTAL_PROCESS	13	0.524382	1.80882	0.0091954	0.228205	50
	GO_NEURON_DIFFERENTIATION	13	0.500578	1.80498	0.0199115	0.223964	59
	GO_RESPONSE_TO_CHEMOKINE	7	0.641221	1.79908	0.0136986	0.223021	53
	GO_CELL_PART_MORPHOGENESIS	7	0.648855	1.79009	0.0182648	0.22923	52
	GO_CELLULAR_COMPONENT_MORPHOGENESIS	13	0.508359	1.78974	0.0200445	0.219645	39
	GO_REGULATION_OF_AXONOGENESIS	3	0.903704	1.7871	0.0041841	0.215423	15
	GO_LYMPHOCYTE_CHEMOTAXIS	7	0.641221	1.78517	0.00438597	0.209442	53
	GO_AXON_DEVELOPMENT	7	0.648855	1.78237	0.0223214	0.205351	52
	GO_REGULATION_OF_LYMPHOCYTE_MIGRATION	8	0.597026	1.77422	0.0254237	0.209385	36
	GO_REGULATION_OF_HEMOPOIESIS	6	0.681818	1.77195	0.0201511	0.205871	47
	GO_REGULATION_OF_CELL_MORPHOGENESIS_INVOLVED_IN_DIFFERENTIATION	3	0.903704	1.75975	0	0.219716	15
	GO_EOSINOPHIL_MIGRATION	5	0.706767	1.75425	0.025641	0.221901	43
	GO_REGULATION_OF_CELLULAR_COMPONENT_SIZE	4	0.773454	1.75318	0.0169133	0.216787	8
	GO_POSITIVE_REGULATION_OF_LEUKOCYTE_MIGRATION	9	0.589164	1.75159	0.020979	0.212465	36
	GO_REGULATION_OF_LEUKOCYTE_MIGRATION	11	0.522286	1.74761	0.0157658	0.211801	36
	GO_POSITIVE_REGULATION_OF_CELL_ACTIVATION	11	0.50893	1.74634	0.0234542	0.208094	39
	GO_REGULATION_OF_LEUKOCYTE_DIFFERENTIATION	4	0.776119	1.74332	0.0154525	0.206978	33
	GO_CELL_MOTILITY	40	0.343746	1.73932	0.00753769	0.208529	33
	GO_EXTRACELLULAR_MATRIX_DISASSEMBLY	4	0.791045	1.7285	0.0106838	0.220103	31
	GO_REGULATION_OF_ANATOMICAL_STRUCTURE_SIZE	4	0.773454	1.72648	0.00862069	0.217783	8
	GO_DEVELOPMENTAL_GROWTH_INVOLVED_IN_MORPHOGENESIS	6	0.64247	1.70802	0.0183299	0.2447	36
	GO_LIPID_CATABOLIC_PROCESS	4	0.762696	1.70425	0.0176211	0.245922	5
	GO_DETOXIFICATION	5	-0.880496	-2.13217	0	0.0963961	11
M3	GO_PROTEIN_LOCALIZATION_TO_ORGANELLE	15	0.627637	2.12781	0	0.12182	47
	GO_ESTABLISHMENT_OF_PROTEIN_LOCALIZATION_TO_ORGANELLE	15	0.627637	2.06558	0	0.12497	47
	GO_CELLULAR_PROTEIN_CATABOLIC_PROCESS	26	0.527975	2.02533	0	0.138465	43
	GO_POSITIVE_REGULATION_OF_CELLULAR_PROTEIN_CATABOLIC_PROCESS	7	0.766869	1.98633	0	0.164766	8
	GO_PROTEIN_CATABOLIC_PROCESS	31	0.48387	1.96728	0.0035545	0.167301	43
	GO_DNA_METABOLIC_PROCESS	10	0.677097	1.96202	0	0.148854	51
	GO_POSITIVE_REGULATION_OF_PROTEIN_CATABOLIC_PROCESS	8	0.707409	1.95838	0.00735294	0.13131	8
	GO_CHROMOSOME_ORGANIZATION	11	0.639145	1.93279	0.00271739	0.153159	51
	GO_CELLULAR_MACROMOLECULE_CATABOLIC_PROCESS	32	0.470542	1.92592	0.00228571	0.144723	43
	GO_REGULATION_OF_PROTEIN_STABILITY	12	0.622356	1.9237	0.005291	0.132326	47
	GO_ADAPTIVE_IMMUNE_RESPONSE	17	0.553083	1.92336	0.00378788	0.120598	7
	GO_DNA_BIOSYNTHETIC_PROCESS	8	0.700252	1.90988	0.00282486	0.123518	51
	GO_PROTEIN_STABILIZATION	9	0.665567	1.90849	0.00137741	0.116026	41
	GO_PROTEIN_FOLDING	16	0.55452	1.90839	0.00253165	0.107893	58
	GO_INTRACELLULAR_TRANSPORT	34	0.459432	1.9003	0	0.109191	48
	GO_SEXUAL_REPRODUCTION	13	0.586616	1.88841	0.00400534	0.115579	52
	GO_ENSHEATHMENT_OF_NEURONS	7	0.719463	1.876	0.00418994	0.125756	53
	GO_ANTIGEN_PROCESSING_AND_PRESENTATION_OF_PEPTIDE_OR_POLYSACCHARIDE_ANTIGEN_VIA_MHC_CLASS_II	8	0.67781	1.85771	0	0.143394	20
	GO_CHAPERONE_MEDIATED_AUTOPHAGY	5	0.781112	1.8411	0	0.163423	29
	GO_POSITIVE_REGULATION_OF_DNA_METABOLIC_PROCESS	5	0.780374	1.82993	0.00791139	0.174093	51
	GO_MEMBRANE_ORGANIZATION	26	0.476034	1.82748	0.00479616	0.170055	53
	GO_MULTI_ORGANISM_REPRODUCTIVE_PROCESS	14	0.559951	1.81909	0.0104849	0.177118	52
	GO_REGULATION_OF_CELLULAR_PROTEIN_CATABOLIC_PROCESS	11	0.594434	1.81313	0.00807537	0.180966	21
	GO_RECEPTOR_MEDIATED_ENDOCYTOSIS	19	0.506478	1.81189	0.00627353	0.1757	31
	GO_POSITIVE_REGULATION_OF_CHROMOSOME_ORGANIZATION	5	0.780374	1.81079	0	0.17055	51
	GO_MACROMOLECULE_CATABOLIC_PROCESS	42	0.415101	1.80562	0.00565611	0.17169	43
	GO_POSITIVE_REGULATION_OF_DNA_BIOSYNTHETIC_PROCESS	5	0.780374	1.80552	0.00783699	0.165411	51
	GO_TELOMERE_ORGANIZATION	5	0.780374	1.80454	0.00750751	0.161212	51
	GO_RESPONSE_TO_INTERLEUKIN_12	4	0.860465	1.8038	0.00474683	0.156815	33
	GO_RNA_DEPENDENT_DNA_BIOSYNTHETIC_PROCESS	5	0.780374	1.80097	0.00764526	0.156013	51
	GO_REGULATION_OF_IMMUNE_SYSTEM_PROCESS	56	0.390117	1.79423	0.010917	0.16181	19
	GO_TELOMERE_MAINTENANCE_VIA_TELOMERE_LENGTHENING	5	0.780374	1.78821	0.00316456	0.166553	51
	GO_REGULATION_OF_CHROMOSOME_ORGANIZATION	5	0.780374	1.78767	0.00153846	0.162298	51
	GO_PROTEOLYSIS	40	0.413327	1.78424	0.00230947	0.16358	87
	GO_ACTIVATION_OF_IMMUNE_RESPONSE	30	0.434	1.77975	0.00698487	0.165129	10
	GO_PROTEIN_IMPORT	6	0.728305	1.77438	0.00439239	0.169238	47
	GO_IMMUNE_RESPONSE_REGULATING_SIGNALING_PATHWAY	22	0.471294	1.76239	0.00609013	0.183637	10
	GO_POSITIVE_REGULATION_OF_CELLULAR_CATABOLIC_PROCESS	11	0.587725	1.75304	0.0094851	0.193495	8
	GO_OSTEOBLAST_DIFFERENTIATION	6	0.70892	1.74473	0.00458015	0.203274	67
	GO_DEFENSE_RESPONSE	64	0.370227	1.73246	0.00749465	0.221066	115
	GO_POSITIVE_REGULATION_OF_CATABOLIC_PROCESS	12	0.551447	1.73219	0.0131926	0.216261	8
	GO_ANATOMICAL_STRUCTURE_HOMEOSTASIS	14	0.538067	1.72988	0.0165816	0.215567	89
	GO_MACROPHAGE_ACTIVATION	8	0.636066	1.72568	0.0124309	0.217945	7
	GO_RESPONSE_TO_TOPOLOGICALLY_INCORRECT_PROTEIN	11	0.570511	1.72106	0.020436	0.222235	47
	GO_REGULATION_OF_NITRIC_OXIDE_BIOSYNTHETIC_PROCESS	4	0.796374	1.72041	0.0164204	0.218602	3
	GO_REGULATION_OF_PROTEIN_CATABOLIC_PROCESS	16	0.500342	1.70723	0.010989	0.239032	25
	GO_POSITIVE_REGULATION_OF_PROTEIN_MODIFICATION_PROCESS	26	0.43533	1.70673	0.0167064	0.235105	60
	GO_CELLULAR_MACROMOLECULE_LOCALIZATION	40	0.394606	1.69918	0.0126437	0.246961	51
	GO_PATTERN_RECOGNITION_RECEPTOR_SIGNALING_PATHWAY	8	0.616016	1.69851	0.01983	0.243496	43
	GO_DEFENSE_RESPONSE_TO_OTHER_ORGANISM	45	0.382185	1.69462	0.00903955	0.246442	115
	GO_NEGATIVE_REGULATION_OF_TUMOR_NECROSIS_FACTOR_SUPERFAMILY_CYTOKINE_PRODUCTION	3	0.847222	1.65647	0.00983607	0.248253	35
	GO_SECRETION	67	0.357005	1.65406	0.0075188	0.249651	98
M4	/
GSEAs were computed using GSEA-P software with MSigDB gene sets. Only gene sets with a false dicovery rate > 25% were kept. NAME, name of the gene set. SIZE, number of genes in the gene set; ES, enrichment score; NES, normalized enrichment score; NOM p-val, nominal p-value; RANK AT MAX, position in the ranked list at which the maximum ES occurred.
